# Supplementary material for: Sablefish (Anoplopoma fimbra Pallas, 1814) plasma biochemistry and hematology reference intervals including blood cell morphology
Source: PLoS One. 2021 Jun 4;16(6):e0246982. doi: 10.1371/journal.pone.0246982 (PMC8177537; doi:10.1371/journal.pone.0246982)
Supplement: S1 Appendix — Data set includes lipemic samples, RI calculation reports for each biochemistry parameter, and a comparison of the RI of 87 fish (with lipemic samples) versus 81 fish (without lipemic samples), plus all conversions from the conventional units to the SI units. (XLSX) [file pone.0246982.s002.xlsx]

## Sheet: Compared values incl lipemic
PLASMA BIOCHEMISTRY	Non lipemic N=81				Lipemic N=87
	Conventional		SI		Conventional		SI		Conventional	SI
	Lower Level	Upper level	Lower Level	Upper level	Lower Level	Upper level	Lower Level	Upper level
Albumin	0.61	1.3	6.1	13	0.62	1.28	6.2	12.8	g/dL	g/L
Globulin	1.91	3.19	19.1	31.9	1.94	3.18	19.4	31.8	g/dL	g/L
Total Protein	2.52	4.49	25.2	44.9	2.56	4.46	25.6	44.6	g/dL	g/L
Glucose	17.1	88.4	0.949221	4.90708	13.2	86.6	0.732732	4.80717	mg/dL	mmol/L
Cholesterol	245	482.5	6.3357	12.4775	245.6	585.4	6.35122	15.1384	mg/dL	mmol/L
Creatinine	0	1.59	0	140.556	0	1.68	0	148.512	mg/dL	µmol/L
Urea nitrogen (BUN)	2	4	0.0714	0.1428	2	4	0.0714	0.1428	mg/dL	mmol/L
Total Bilirubin	0.1	0.2	1.71	3.42	0.1	0.28	1.71	4.788	mg/dL	µmol/L
Alanine aminotransferase (ALT/SGPT)	0	17.8	0	17.8	0	17	0	17	U/L	U/L
Aspartate aminotransferase (AST, SGOT)	0	110.4	0	1.8768	0	88.8	0	1.5096	U/L	µKat/L
Creatine kinase (CK)	5.1	87.4	0.0867	1.4858	5.2	85.6	0.0884	1.4552	U/L	µKat/L
Sodium	168	179.9	168	179.9	168	180	168	180	mEq/L	mmol/L
Potassium	1.2	3.86	1.2	3.86	1.19	3.76	1.19	3.76	mEq/L	mmol/L
Chloride	142	153	142	153	142	153	142	153	mEq/L	mmol/L
Calcium	10.51	13.38	2.6275	3.345	10.52	13.32	2.63	3.33	mg/dL	mmol/L
Phosphorus	12.92	26.06	4.17187	8.41477	12.98	26.66	4.19124	8.60851	mg/dL	mmol/L
Total C02	4.64	8.7	4.64	8.7	4.74	8.7	4.74	8.7	mEq/L	mmol/L
Anion Gap	18.1	27	18.1	27	18.2	28	18.2	28	mEq/L	nmol/L

## Sheet: All data (red=lipemic)
Fish #	sampling date in 2019	AST (U/L)	BUN (mg/dl)	Creatinine (mg/dl)	Glucose (mg/dl)	Cholesterol (mg/dl)	Total Protein (g/dL)	Albumin (g/dL)	Bilirubin, Total (mg/dl)	CK (U/L)	ALT (SGPT) (U/L)	Sodium (mEq/L)	Potassium (mEq/L)	Chloride (mEq/L)	Calcium (mg/dl)	Phosphorus (mg/dl)	Total CO2 (mEq/L)	Anion Gap (mEq/L)
32	2020-06-20	0	4	1.6	7	597	3.6	1	0.2	44	7	180	1.2	143	11.5	28.3	8.1	30
33	2020-06-20	2	4	0.9	13	327	3.7	1.1	0.2	43	1	179	<1.2	147	12.1	24	6.5	27
34	2020-06-20	2	4	1.3	15	365	4	1.2	0.3	54	2	177	1.1	144	12.9	24	5.7	28
37	2020-06-24	0	2	1	36	351	3.7	1.2	0.2	27	1	176	2.2	148	11.4	16	8.3	22
38	2020-06-24	3	2	1.4	41	349	3.8	1.1	0.2	36	3	177	2.6	148	11.3	18.4	7.5	24
39	2020-06-25	0	2	1	39	458	4.2	1.2	0.3	26	0	169	2.7	140	11.4	12.5	9.8	22
40	2020-06-25	5	2	1.6	46	364	3.8	1.1	0.2	23	0	177	3	148	11.2	13.3	8.2	24
41	2020-06-25	8	2	0.9	42	410	3.5	1	0.2	18	2	170	3.7	144	10.6	12.9	8.7	21
42	2020-06-26	0	3	1.3	19	379	3.8	1.1	0.2	52	1	174	1.9	144	11.8	26.8	8.4	24
43	2020-06-26	2	2	0.8	34	367	3.2	1	0.2	18	0	173	2	147	10.8	18	8.6	19
44	2020-06-26	2	3	1.4	42	335	3.6	1	0.2	32	1	170	2.4	144	10.8	17.8	8.7	20
47	2020-07-02	6	4	1.7	43	293	3.1	1	0.2	22	2	174	2.3	151	10.8	20.1	6.4	19
48	2020-07-02	12	3	0.9	35	539	4	1.2	0.1	25	1	175	2.7	149	11.7	18.7	5.6	23
49	2020-07-02	6	2	0.6	45	419	3.9	1.2	0.2	31	1	177	3.7	152	11.3	15.5	6.1	23
50	2020-07-05	25	3	0.9	30	353	3	0.8	0.2	5	5	175	1.6	150	11.8	15.3	5.4	21
122(50a)	2020-07-10	13	3	1	18	259	2.5	0.7	0.2	43	5	175	1.8	151	10.8	25.3	5.8	20
51	2020-07-10	15	3	0.9	14	280	3	0.8	0.2	22	3	173	<1.2	145	11.8	24.7	6.3	23
52	2020-07-10	22	3	0	34	401	3.3	1	0	88	3	177	1.2	151	12.2	24.2	5.6	22
53	2020-07-10	7	3	1.1	21	261	3.3	1	0.1	14	2	174	1.2	148	11.9	21.5	5.7	22
54	2020-07-10	5	3	0.5	21	377	4	1.3	0.2	29	2	176	1.8	145	12.7	23.1	6.5	26
55	2020-07-10	18	4	0.4	28	483	4	1.3	0.2	30	3	178	1.3	147	13.4	24	5.6	27
56	2020-07-10	10	4	0.2	17	307	3.2	1	0.2	26	3	170	1.4	143	11.5	23.7	6.9	22
57	2020-07-10	5	2	0	35	448	3.1	0.8	0.2	12	1	177	<1.2	152	12.2	21.2	5.9	20
58	2020-07-10	6	4	0.4	20	661	3.6	0.9	0.2	4	1	168	1.8	142	12.1	21.6	6.1	22
59	2020-07-10	9	3	0.8	28	381	3.7	1.1	0.2	25	3	174	2	144	12.3	26.1	4.5	28
60	2020-07-10	11	3	0.4	18	349	3.2	0.9	0.2	20	2	174	1.4	148	12.2	22.3	5.8	22
61	2020-07-10	14	2	0.5	28	380	4	1.1	0.2	17	4	171	1.2	143	12.2	22.9	5.7	24
62	2020-07-10	7	3	0.3	37	292	3.5	1	0.2	22	3	172	1.7	148	11.5	18.5	5.4	20
63	2020-07-10	4	3	0.7	30	327	3.2	1	0.2	12	1	172	1.5	147	11.8	21.3	6.5	20
64	2020-07-10	15	3	0.3	24	443	3.9	1.1	0.2	25	5	174	1.7	145	12.5	23.5	6.3	24
65	2020-07-10	14	3	0.7	31	342	3.2	1	0.2	16	3	176	1.5	149	12	24.7	5.5	23
66	2020-07-10	5	3	1.2	32	268	3	0.9	0.1	6	2	168	1.6	144	11.9	20.5	6.2	19
67	2020-07-10	8	3	0.2	37	412	3.5	1	0.2	12	2	175	<1.2	147	12.5	21.7	5.8	23
68	2020-07-10	6	3	0.8	29	297	2.8	0.8	0.1	20	2	171	2.2	147	11.1	20	7.3	19
69	2020-07-10	9	2	0.8	44	310	3	0.9	0.1	27	2	172	1.6	147	11.2	21.4	5.8	21
70	2020-07-10	9	3	0.2	31	327	3.1	0.9	0.2	47	4	173	1.9	147	11.9	21.2	6.7	21
71	2020-07-10	5	2	0	41	279	2.4	0.6	0.1	10	1	174	1.5	151	10.5	19.6	6.6	18
72	2020-07-10	24	2	0.9	62	442	3.9	1.1	0.2	25	5	171	1.3	145	12.6	17.5	5.5	22
73	2020-07-10	26	2	0.8	48	405	3.3	0.9	0.2	28	8	175	1.9	150	11.9	21.3	5.3	22
74	2020-07-10	5	2	0.5	45	358	3.4	1	0.1	12	1	173	2.4	148	11.8	16.7	6.8	21
75	2020-07-10	38	3	0.5	76	419	4	1.1	0.2	41	6	170	2.5	143	12.3	18.4	5.3	24
76	2020-07-10	12	2	0.8	47	388	3.7	1	0.2	49	4	172	2.6	145	11.9	16.8	6.1	24
77	2020-07-10	7	2	0.6	89	338	3.2	0.9	0.1	24	1	176	2.8	154	10.9	15.7	4.6	20
78	2020-07-10	11	2	0.5	56	313	3.5	1	0.2	23	3	172	2.5	148	11.7	14.4	6.7	20
79	2020-07-10	21	2	0	64	374	2.8	0.8	0.1	36	5	176	2.7	153	11.1	15	6.5	19
80	2020-07-10	8	2	0.4	61	452	4	1.1	0.2	10	2	175	2.8	150	12.1	13.5	5.8	22
81	2020-07-10	12	2	0.5	73	438	3.7	1.1	0.2	24	3	178	2.5	153	12.2	16.8	5.4	22
82	2020-07-17	5	3	5	25	286	3.3	0.8	0.2	13	2	173	<1.2	145	11.7	22.9	6.9	22
83	2020-07-17	7	3	0.7	20	248	3.5	1	0.2	28	3	172	1.3	146	11.7	22.6	6.6	21
84	2020-07-17	14	3	0.5	19	289	3.5	0.8	0.2	25	3	172	1.2	143	11.4	19.9	7.2	23
85	2020-07-17	3	2	0.9	26	279	3.3	0.9	0.2	27	1	171	<1.2	144	11.5	17.8	7.4	21
86	2020-07-17	1	3	0.3	24	287	3.8	1.1	0.2	23	2	169	<1.2	142	11.9	16.8	7.4	21
87	2020-07-17	5	2	0.7	26	282	3.6	0.9	0.1	36	2	172	1.2	145	11.9	18.9	5.5	23
88	2020-07-17	6	3	1.1	28	270	3.5	0.8	0.2	17	1	173	1.2	144	11.8	19.9	7.5	23
89	2020-07-17	11	3	0.8	31	284	3.6	1	0.2	76	4	175	1.3	148	12.6	19.9	6.9	21
90	2020-07-17	0	3	0	39	346	3.4	0.9	0.1	12	0	170	<1.2	145	12.6	19.8	6.6	20
91	2020-07-17	40	2	0.1	30	473	4.3	1.1	0.2	34	7	173	<1.2	145	14.1	17.7	5.9	23
92	2020-07-17	0	2	0.4	35	285	3.3	0.9	0.1	11	0	170	1.4	146	11.1	15.5	6.7	19
93	2020-07-17	7	3	0.6	29	349	3.6	0.9	0.2	16	2	174	<1.2	145	12.5	22.5	6.9	23
94	2020-07-17	15	3	0.7	24	229	3.1	0.8	0.1	27	4	174	1.2	148	11.5	21.5	6.3	21
95	2020-07-17	8	2	0.4	34	415	4.2	0.8	0.2	13	2	170	1.9	142	11.6	16	6.6	23
96	2020-07-17	30	3	0.2	43	259	3.7	1	0.1	38	5	170	1.8	146	12	19.1	5.7	20
97	2020-07-17	5	2	0.7	30	315	3.2	0.8	0.2	11	2	172	1.3	148	11.2	16.4	6	19
98	2020-07-17	4	2	0.5	42	315	3.2	0.8	0.2	12	2	174	1.3	148	11.3	16.5	6.1	21
99	2020-07-17	10	3	0.4	21	253	3.4	0.9	0.1	21	3	171	1.2	144	11.5	20.6	6.5	22
100	2020-07-17	19	3	0.1	30	355	3.6	0.9	0.1	20	4	172	1.2	145	11.8	19.9	6.3	22
101	2020-07-17	3	2	0.4	35	280	3.6	0.9	0.2	8	1	172	1.4	146	11.5	15.2	6.7	21
102	2020-07-17	17	2	0.7	33	445	3.7	0.8	0.2	16	3	171	<1.2	146	11.8	15.8	7.7	18
103	2020-07-17	9	2	0.6	31	288	3.4	0.8	0.1	16	2	171	1.9	147	11.6	17.9	7.1	19
104	2020-07-17	14	2	0.7	29	279	2.9	0.7	0.1	15	2	171	1.3	146	11.2	20	6.2	20
105	2020-07-17	21	2	0.4	40	313	3.3	0.9	0.2	23	4	171	2.2	146	11.5	16.1	7.1	20
106	2020-07-17	8	2	0.3	29	396	4.5	1.2	0.2	22	1	175	1.5	146	12.6	19.1	7	24
107	2020-07-17	4	2	0	39	362	3.4	0.8	0.2	17	1	172	2.5	146	11.2	13.3	7.4	21
108	2020-07-17	8	3	0.4	27	348	3.8	1	0.2	25	2	174	1.4	145	12.6	22.9	6.4	24
109	2020-07-17	26	2	0.1	34	294	3.6	0.8	0.2	29	4	170	2.3	145	11.2	15.1	6.5	21
110	2020-07-17	5	3	0.6	39	311	3.5	0.7	0.2	14	1	172	2.1	146	11.4	14.2	7.4	21
111	2020-07-17	31	2	0.3	45	280	3.6	0.8	0.2	35	6	172	2.3	146	11.6	16.4	6.2	22
112	2020-07-17	5	3	0.6	44	291	3.8	1	0.2	18	2	170	2.2	143	11.5	15.2	7.9	21
113	2020-07-17	16	2	0.7	58	348	4.5	1.1	0.2	17	3	172	2.3	144	13	14.5	7.6	23
114	2020-07-17	4	2	0.6	46	306	4	0.9	0.2	14	2	173	2.5	147	11.7	15.1	6.2	22
115	2020-07-17	10	2	0.8	93	249	3.7	1	0.2	16	2	180	2.1	151	11.8	19.4	7.7	23
116	2020-07-17	76	3	0.6	37	285	3.9	0.8	0.2	35	13	174	2.8	145	11.4	17.1	7.1	25
117	2020-07-17	215	3	0.5	33	245	3.2	0.5	0.2	146	40	166	4.5	142	9.7	14.7	8.6	20
118	2020-07-17	5	2	0.5	66	335	3.6	0.9	0.2	11	2	172	1.8	145	11.3	14	8.7	20
119	2020-07-17	7	2	0.6	73	398	3.8	1	0.2	13	3	181	1.7	152	12.5	19.4	6.5	24
120	2020-07-17	65	2	0.8	73	370	3.6	0.8	0.2	36	10	175	1.6	145	11.4	18.7	6.1	26
121	2020-07-17	92	3	0.7	77	330	4.2	1.1	0.2	65	18	177	3.4	148	12.6	21.9	6.3	26

## Sheet: Report for Anion Gap (mEq_L)
Reference Value Advisor V2.1	Results for Anion Gap (mEq/L)																Anion Gap (mEq/L)	Anion Gap (mEq/L)Box-Cox
				Date	2021-01-27												18	0.0645231			Suspect Value
				Performed by	schubigc												18	0.0645231			Outlier
																	19	0.817
																	19	0.817
																	19	0.817
																	19	0.817
	Untransformed data		Box-Cox transformed data														19	0.817
Method	Standard	Robust	Standard	Robust	Nonparametric												19	0.817
																	19	0.817
																	19	0.817
N	87	87	87	87	87												20	1.34817
Mean	22.046		2.02524														20	1.34817
Median	22	21.5824	2.12877	2.03699													20	1.34817
SD	2.33232	2.34405	0.77424	0.785765													20	1.34817
Mininum	18	18	0.0645231	0.0645231													20	1.34817
Maximum	30	30	3.99225	3.99225													20	1.34817
																	20	1.34817
l1 coefficient Box-Cox			-16.9341	-16.9341													20	1.34817
l2 coefficient Box-Cox			0.320836	0.320836													20	1.34817
P-Value Anderson-Darling/	0.000285775		0.0150689														20	1.34817
Symmetry test for Robust		2.34488e-12		7.60025e-17													20	1.34817
																	20	1.34817
Outliers Dixon																	20	1.34817
Outliers Tukey	0	0	0	0													21	1.77144
Suspect data Tukey	3	3	0	0													21	1.77144
																	21	1.77144
																	21	1.77144
Lower limit of reference interval	17.3829	16.9226	18.4931	18.49	18.2												21	1.77144
Upper limit of reference interval	26.709	26.2423	27.7459	27.8766	28												21	1.77144
																	21	1.77144
90% CI for lower limit	16.7626	16.0522	18.2139	18.1753	18												21	1.77144
	18.0748	17.9099	18.836	18.8806	19												21	1.77144
90% CI for upper limit	25.5908	25.5622	26.4789	26.6113	26.8												21	1.77144
	27.7925	27.4081	28.953	29.0683	30												21	1.77144
																	21	1.77144
Comments																	21	1.77144
The sample size is large enough to compute the nonparametric reference interval : [18.2 ; 28].																	21	1.77144
The confidence intervals of the limits of the nonparametric reference interval was determined using a bootstrap method.																	21	1.77144
The 90% CI of one (or more) limit is larger than recommended in IFCC-CLSI C28-A3.																	21	1.77144
																	22	2.12877
																	22	2.12877
																	22	2.12877
																	22	2.12877
																	22	2.12877
																	22	2.12877
																	22	2.12877
																	22	2.12877
																	22	2.12877
																	22	2.12877
																	22	2.12877
																	22	2.12877
																	22	2.12877
																	22	2.12877
																	22	2.12877
																	22	2.12877
																	23	2.44089
																	23	2.44089
																	23	2.44089
																	23	2.44089
																	23	2.44089
																	23	2.44089
																	23	2.44089
																	23	2.44089
																	23	2.44089
																	23	2.44089
																	23	2.44089
																	23	2.44089
																	23	2.44089
																	24	2.71976
																	24	2.71976
																	24	2.71976
																	24	2.71976
																	24	2.71976
																	24	2.71976
																	24	2.71976
																	24	2.71976
																	24	2.71976
																	24	2.71976
																	25	2.97297
																	26	3.20565
																	26	3.20565
																	26	3.20565
																	27	3.4215
																	27	3.4215
																	28	3.62324
																	28	3.62324
																	30	3.99225

## Sheet: Report for Total CO2 (mEq_L)
Reference Value Advisor V2.1	Results for Total CO2 (mEq/L)																Total CO2 (mEq/L)	Total CO2 (mEq/L)Box-Cox
				Date	2021-01-27												4.5	0.980448
				Performed by	schubigc												4.6	0.989706
																	5.3	1.04635
																	5.3	1.04635
																	5.4	1.05345
																	5.4	1.05345
	Untransformed data		Box-Cox transformed data														5.4	1.05345
Method	Standard	Robust	Standard	Robust	Nonparametric												5.5	1.06034
																	5.5	1.06034
																	5.5	1.06034
N	87	87	87	87	87												5.6	1.06703
Mean	6.61954		1.11966														5.6	1.06703
Median	6.5	6.51881	1.11951	1.11941													5.6	1.06703
SD	1.00508	1.0179	0.0493236	0.0496288													5.7	1.07352
Mininum	4.5	4.5	0.980448	0.980448													5.7	1.07352
Maximum	9.8	9.8	1.24113	1.24113													5.7	1.07352
																	5.7	1.07352
l1 coefficient Box-Cox			-0.119689	-0.119689													5.8	1.07983
l2 coefficient Box-Cox			-0.598765	-0.598765													5.8	1.07983
P-Value Anderson-Darling/	0.0051802		0.476955														5.8	1.07983
Symmetry test for Robust		0.000802782		6.51897e-05													5.8	1.07983
																	5.8	1.07983
Outliers Dixon	Max	Max															5.9	1.08597
Outliers Tukey	0	0	0	0													5.9	1.08597
Suspect data Tukey	1	1	0	0													6	1.09194
																	6.1	1.09774
																	6.1	1.09774
Lower limit of reference interval	4.61005	4.4953	4.96709	4.9635	4.74												6.1	1.09774
Upper limit of reference interval	8.62903	8.54233	8.99595	8.98943	8.7												6.1	1.09774
																	6.1	1.09774
90% CI for lower limit	4.36044	4.14495	4.77639	4.7667	4.5												6.2	1.1034
	4.85636	4.76776	5.17627	5.1468	5.4												6.2	1.1034
90% CI for upper limit	8.21556	8.13185	8.5026	8.42965	8.6												6.2	1.1034
	8.98063	8.92781	9.52364	9.574	9.8												6.2	1.1034
																	6.3	1.10891
Comments																	6.3	1.10891
The sample size is large enough to compute the nonparametric reference interval : [4.74 ; 8.7].																	6.3	1.10891
The confidence intervals of the limits of the nonparametric reference interval was determined using a bootstrap method.																	6.3	1.10891
The 90% CI of one (or more) limit is larger than recommended in IFCC-CLSI C28-A3.																	6.3	1.10891
																	6.4	1.11428
																	6.4	1.11428
																	6.5	1.11951
																	6.5	1.11951
																	6.5	1.11951
																	6.5	1.11951
																	6.5	1.11951
																	6.5	1.11951
																	6.5	1.11951
																	6.6	1.12461
																	6.6	1.12461
																	6.6	1.12461
																	6.6	1.12461
																	6.7	1.12959
																	6.7	1.12959
																	6.7	1.12959
																	6.7	1.12959
																	6.8	1.13445
																	6.9	1.13919
																	6.9	1.13919
																	6.9	1.13919
																	6.9	1.13919
																	7	1.14383
																	7.1	1.14836
																	7.1	1.14836
																	7.1	1.14836
																	7.2	1.15278
																	7.3	1.15711
																	7.4	1.16134
																	7.4	1.16134
																	7.4	1.16134
																	7.4	1.16134
																	7.5	1.16548
																	7.5	1.16548
																	7.6	1.16953
																	7.7	1.17349
																	7.7	1.17349
																	7.9	1.18117
																	8.1	1.18855
																	8.2	1.19213
																	8.3	1.19563
																	8.4	1.19907
																	8.6	1.20576
																	8.6	1.20576
																	8.7	1.209
																	8.7	1.209
																	8.7	1.209
																	9.8	1.24113

## Sheet: Report for Phosphorus (mg_dl)
Reference Value Advisor V2.1	Results for Phosphorus (mg/dl)																Phosphorus (mg/dl)	Phosphorus (mg/dl)Box-Cox
				Date	2021-01-27												12.5	2.61848
				Performed by	schubigc												12.9	2.83226
																	13.3	3.0397
																	13.3	3.0397
																	13.5	3.14124
																	14	3.38926
	Untransformed data		Box-Cox transformed data														14.2	3.48629
Method	Standard	Robust	Standard	Robust	Nonparametric												14.4	3.58217
																	14.5	3.62968
																	14.7	3.72391
N	87	87	87	87	87												15	3.86329
Mean	19.0908		5.49493														15.1	3.90925
Median	19.1	18.9745	5.586	5.49367													15.1	3.90925
SD	3.60109	3.62694	1.40549	1.41876													15.2	3.95496
Mininum	12.5	12.5	2.61848	2.61848													15.2	3.95496
Maximum	28.3	28.3	8.72989	8.72989													15.3	4.00044
																	15.5	4.09071
l1 coefficient Box-Cox			-7.71787	-7.71787													15.5	4.09071
l2 coefficient Box-Cox			0.609787	0.609787													15.7	4.18007
P-Value Anderson-Darling/	0.254303		0.390281														15.8	4.22442
Symmetry test for Robust		0.626733		0.774726													16	4.31249
																	16	4.31249
Outliers Dixon																	16.1	4.35621
Outliers Tukey	0	0	0	0													16.4	4.48618
Suspect data Tukey	0	0	0	0													16.4	4.48618
																	16.5	4.52911
																	16.7	4.6144
Lower limit of reference interval	11.8911	11.7644	12.623	12.6013	12.98												16.8	4.65677
Upper limit of reference interval	26.2906	26.1846	26.9351	26.964	26.66												16.8	4.65677
																	16.8	4.65677
90% CI for lower limit	10.768	10.6521	11.859	11.8865	12.5												17.1	4.78279
	12.9718	12.7682	13.4165	13.3878	13.6												17.5	4.94841
90% CI for upper limit	25.1458	25.0143	25.6499	25.5908	24.7												17.7	5.03022
	27.4875	27.2578	28.3117	28.1591	28.3												17.8	5.07089
																	17.8	5.07089
Comments																	17.9	5.1114
The sample size is large enough to compute the nonparametric reference interval : [12.98 ; 26.66].																	18	5.15175
The confidence intervals of the limits of the nonparametric reference interval was determined using a bootstrap method.																	18.4	5.31167
The 90% CI of one (or more) limit is larger than recommended in IFCC-CLSI C28-A3.																	18.4	5.31167
																	18.5	5.35128
																	18.7	5.43007
																	18.7	5.43007
																	18.9	5.50831
																	19.1	5.586
																	19.1	5.586
																	19.4	5.70155
																	19.4	5.70155
																	19.6	5.77793
																	19.8	5.85382
																	19.9	5.89158
																	19.9	5.89158
																	19.9	5.89158
																	19.9	5.89158
																	20	5.92922
																	20	5.92922
																	20.1	5.96674
																	20.5	6.11565
																	20.6	6.1526
																	21.2	6.37195
																	21.2	6.37195
																	21.3	6.40813
																	21.3	6.40813
																	21.4	6.44421
																	21.5	6.48019
																	21.5	6.48019
																	21.6	6.51607
																	21.7	6.55184
																	21.9	6.6231
																	22.3	6.76444
																	22.5	6.83454
																	22.6	6.86945
																	22.9	6.97365
																	22.9	6.97365
																	22.9	6.97365
																	23.1	7.04266
																	23.5	7.17965
																	23.7	7.24764
																	24	7.349
																	24	7.349
																	24	7.349
																	24.2	7.41617
																	24.7	7.58271
																	24.7	7.58271
																	25.3	7.78006
																	26.1	8.03915
																	26.8	8.26227
																	28.3	8.72989

## Sheet: Report for Calcium (mg_dl)
Reference Value Advisor V2.1	Results for Calcium (mg/dl)																Calcium (mg/dl)	Calcium (mg/dl)Box-Cox
				Date	2021-01-27												9.7	0.385621
				Performed by	schubigc												10.5	0.385621
																	10.6	0.385621
																	10.8	0.385621
																	10.8	0.385621
																	10.8	0.385621
	Untransformed data		Box-Cox transformed data														10.8	0.385621
Method	Standard	Robust	Standard	Robust	Nonparametric												10.9	0.385621
																	11.1	0.385621
																	11.1	0.385621
N	87	87	87	87	87												11.1	0.385621
Mean	11.7575		0.385621														11.2	0.385621
Median	11.7	11.7276	0.385621	0.385621													11.2	0.385621
SD	0.661153	0.666927	8.63901e-08	8.70523e-08													11.2	0.385621
Mininum	9.7	9.7	0.385621	0.385621													11.2	0.385621
Maximum	14.1	14.1	0.385622	0.385622													11.2	0.385621
																	11.2	0.385621
l1 coefficient Box-Cox			70.5307	70.5307													11.3	0.385621
l2 coefficient Box-Cox			-2.59319	-2.59319													11.3	0.385621
P-Value Anderson-Darling/	0.0675189		0.0970517														11.3	0.385621
Symmetry test for Robust		3.33489e-07		3.27211e-06													11.3	0.385621
																	11.4	0.385621
Outliers Dixon			Min	Min													11.4	0.385621
Outliers Tukey	0	0	0	0													11.4	0.385621
Suspect data Tukey	3	3	2	2													11.4	0.385621
																	11.4	0.385621
																	11.4	0.385621
Lower limit of reference interval	10.4356	10.4018	10.4684	10.4394	10.52												11.5	0.385621
Upper limit of reference interval	13.0793	13.0534	13.1035	13.0763	13.32												11.5	0.385621
																	11.5	0.385621
90% CI for lower limit	10.236	10.1494	10.2662	10.2459	9.7												11.5	0.385621
	10.6372	10.6614	10.6716	10.6798	10.8												11.5	0.385621
90% CI for upper limit	12.881	12.785	12.8866	12.811	12.7												11.5	0.385621
	13.2948	13.3077	13.3262	13.3308	14.1												11.5	0.385621
																	11.5	0.385621
Comments																	11.5	0.385621
Possible outliers detected according to Tukey or Dixon. IFCC-CLSI C28-A3 recommends that unless outliers are																	11.6	0.385621
known to be aberrant observations, the emphasis should be on retaining rather than deleting them.																	11.6	0.385621
The sample size is large enough to compute the nonparametric reference interval : [10.52 ; 13.32].																	11.6	0.385621
The confidence intervals of the limits of the nonparametric reference interval was determined using a bootstrap method.																	11.7	0.385621
The 90% CI of one (or more) limit is larger than recommended in IFCC-CLSI C28-A3.																	11.7	0.385621
																	11.7	0.385621
																	11.7	0.385621
																	11.7	0.385621
																	11.8	0.385621
																	11.8	0.385621
																	11.8	0.385621
																	11.8	0.385621
																	11.8	0.385621
																	11.8	0.385621
																	11.8	0.385621
																	11.8	0.385621
																	11.8	0.385621
																	11.9	0.385621
																	11.9	0.385621
																	11.9	0.385621
																	11.9	0.385621
																	11.9	0.385621
																	11.9	0.385621
																	11.9	0.385621
																	12	0.385621
																	12	0.385621
																	12.1	0.385621
																	12.1	0.385621
																	12.1	0.385621
																	12.2	0.385621
																	12.2	0.385621
																	12.2	0.385621
																	12.2	0.385621
																	12.2	0.385621
																	12.3	0.385621
																	12.3	0.385621
																	12.5	0.385621
																	12.5	0.385621
																	12.5	0.385621
																	12.5	0.385621
																	12.6	0.385621
																	12.6	0.385621
																	12.6	0.385621
																	12.6	0.385621
																	12.6	0.385621
																	12.6	0.385621
																	12.7	0.385621
																	12.9	0.385621
																	13	0.385621
																	13.4	0.385621
																	14.1	0.385622

## Sheet: Report for Chloride (mEq_L)
Reference Value Advisor V2.1	Results for Chloride (mEq/L)																Chloride (mEq/L)	Chloride (mEq/L)Box-Cox
				Date	2021-01-27												140	139.1
				Performed by	schubigc												142	141.1
																	142	141.1
																	142	141.1
																	142	141.1
																	143	142.1
	Untransformed data		Box-Cox transformed data														143	142.1
Method	Standard	Robust	Standard	Robust	Nonparametric												143	142.1
																	143	142.1
																	143	142.1
N	87	87	87	87	87												143	142.1
Mean	146.494		145.594														144	143.1
Median	146	146.256	145.1	145.356													144	143.1
SD	2.87683	2.93678	2.87683	2.93678													144	143.1
Mininum	140	140	139.1	139.1													144	143.1
Maximum	154	154	153.1	153.1													144	143.1
																	144	143.1
l1 coefficient Box-Cox			0.1	0.1													144	143.1
l2 coefficient Box-Cox			1	1													144	143.1
P-Value Anderson-Darling/	0.0022132		0.0022132														144	143.1
Symmetry test for Robust		7.22508e-11		5.24703e-14													144	143.1
																	145	144.1
Outliers Dixon																	145	144.1
Outliers Tukey	0	0	0	0													145	144.1
Suspect data Tukey	4	4	4	4													145	144.1
																	145	144.1
																	145	144.1
Lower limit of reference interval	140.743	140.417	140.743	140.417	142												145	144.1
Upper limit of reference interval	152.246	152.094	152.246	152.094	153												145	144.1
																	145	144.1
90% CI for lower limit	140.168	139.413	140.044	139.547	140												145	144.1
	141.465	141.221	141.481	141.247	142.2												145	144.1
90% CI for upper limit	151.171	150.962	151.172	150.98	151.81												145	144.1
	153.219	152.993	153.245	153.186	154												145	144.1
																	145	144.1
Comments																	145	144.1
Suspect data detected according to Tukey. IFCC-CLSI C28-A3 recommends that unless these data																	145	144.1
are known to be aberrant observations, the emphasis should be on retaining rather than deleting them.																	146	145.1
The sample size is large enough to compute the nonparametric reference interval : [142 ; 153].																	146	145.1
The confidence intervals of the limits of the nonparametric reference interval was determined using a bootstrap method.																	146	145.1
The 90% CI of one (or more) limit is larger than recommended in IFCC-CLSI C28-A3.																	146	145.1
																	146	145.1
																	146	145.1
																	146	145.1
																	146	145.1
																	146	145.1
																	146	145.1
																	146	145.1
																	147	146.1
																	147	146.1
																	147	146.1
																	147	146.1
																	147	146.1
																	147	146.1
																	147	146.1
																	147	146.1
																	147	146.1
																	147	146.1
																	148	147.1
																	148	147.1
																	148	147.1
																	148	147.1
																	148	147.1
																	148	147.1
																	148	147.1
																	148	147.1
																	148	147.1
																	148	147.1
																	148	147.1
																	148	147.1
																	148	147.1
																	149	148.1
																	149	148.1
																	150	149.1
																	150	149.1
																	150	149.1
																	151	150.1
																	151	150.1
																	151	150.1
																	151	150.1
																	151	150.1
																	152	151.1
																	152	151.1
																	152	151.1
																	153	152.1
																	153	152.1
																	154	153.1

## Sheet: Report for Potassium (mEq_L)
Reference Value Advisor V2.1	Results for Potassium (mEq/L)																Potassium (mEq/L)	Potassium (mEq/L)Box-Cox
				Date	2021-01-27												1.1	-1.3379
				Performed by	schubigc												1.2	-1.10026
																	1.2	-1.10026
																	1.2	-1.10026
																	1.2	-1.10026
																	1.2	-1.10026
	Untransformed data		Box-Cox transformed data														1.2	-1.10026
Method	Standard	Robust	Standard	Robust	Nonparametric												1.2	-1.10026
																	1.2	-1.10026
																	1.2	-1.10026
N	76	76	76	76	76												1.2	-1.10026
Mean	1.95658		-0.189808														1.3	-0.918115
Median	1.8	1.86912	-0.256889	-0.227625													1.3	-0.918115
SD	0.689606	0.711515	0.700669	0.709435													1.3	-0.918115
Mininum	1.1	1.1	-1.3379	-1.3379													1.3	-0.918115
Maximum	4.5	4.5	1.87175	1.87175													1.3	-0.918115
																	1.3	-0.918115
l1 coefficient Box-Cox			-1.0442	-1.0442													1.3	-0.918115
l2 coefficient Box-Cox			0.623998	0.623998													1.4	-0.761624
P-Value Anderson-Darling/	0.000205347		0.0262428														1.4	-0.761624
Symmetry test for Robust		8.4692e-10		1.90385e-08													1.4	-0.761624
																	1.4	-0.761624
Outliers Dixon	Max	Max															1.4	-0.761624
Outliers Tukey	0	0	0	0													1.5	-0.621068
Suspect data Tukey	1	1	0	0													1.5	-0.621068
																	1.5	-0.621068
																	1.5	-0.621068
Lower limit of reference interval	0.573805	0.451713	1.0444	-999999999999	1.1925												1.6	-0.491746
Upper limit of reference interval	3.33935	3.28653	3.51456	3.47323	3.76												1.6	-0.491746
																	1.6	-0.491746
90% CI for lower limit	0.40019	0.182018	ND	ND	1.1												1.6	-0.491746
	0.787984	0.736682	1.07466	1.08058	1.2												1.7	-0.370936
90% CI for upper limit	2.99374	2.94234	3.16502	3.14196	3.0015												1.7	-0.370936
	3.63936	3.60703	3.84643	3.83691	4.5												1.7	-0.370936
																	1.8	-0.256889
Comments																	1.8	-0.256889
The sample size is large enough to compute the nonparametric reference interval : [1.19 ; 3.76].																	1.8	-0.256889
The confidence intervals of the limits of the nonparametric reference interval was determined using a bootstrap method.																	1.8	-0.256889
The 90% CI of one (or more) limit is larger than recommended in IFCC-CLSI C28-A3.																	1.8	-0.256889
																	1.9	-0.148396
																	1.9	-0.148396
																	1.9	-0.148396
																	1.9	-0.148396
																	1.9	-0.148396
																	2	-0.044578
																	2	-0.044578
																	2.1	0.0552261
																	2.1	0.0552261
																	2.2	0.151532
																	2.2	0.151532
																	2.2	0.151532
																	2.2	0.151532
																	2.3	0.244752
																	2.3	0.244752
																	2.3	0.244752
																	2.3	0.244752
																	2.4	0.335218
																	2.4	0.335218
																	2.5	0.423207
																	2.5	0.423207
																	2.5	0.423207
																	2.5	0.423207
																	2.5	0.423207
																	2.6	0.50895
																	2.6	0.50895
																	2.7	0.592644
																	2.7	0.592644
																	2.7	0.592644
																	2.8	0.674458
																	2.8	0.674458
																	2.8	0.674458
																	3	0.83301
																	3.4	1.13289
																	3.7	1.34534
																	3.7	1.34534
																	4.5	1.87175

## Sheet: Report for Sodium (mEq_L)
Reference Value Advisor V2.1	Results for Sodium (mEq/L)																Sodium (mEq/L)	Sodium (mEq/L)Box-Cox
				Date	2021-01-27												166	165.1
				Performed by	schubigc												168	167.1
																	168	167.1
																	169	168.1
																	169	168.1
																	170	169.1
	Untransformed data		Box-Cox transformed data														170	169.1
Method	Standard	Robust	Standard	Robust	Nonparametric												170	169.1
																	170	169.1
																	170	169.1
N	87	87	87	87	87												170	169.1
Mean	173.253		172.353														170	169.1
Median	173	173.095	172.1	172.195													170	169.1
SD	2.89433	2.92347	2.89433	2.92347													170	169.1
Mininum	166	166	165.1	165.1													170	169.1
Maximum	181	181	180.1	180.1													171	170.1
																	171	170.1
l1 coefficient Box-Cox			0.1	0.1													171	170.1
l2 coefficient Box-Cox			1	1													171	170.1
P-Value Anderson-Darling/	0.0299157		0.0299157														171	170.1
Symmetry test for Robust		1.60319e-09		2.34488e-12													171	170.1
																	171	170.1
Outliers Dixon																	171	170.1
Outliers Tukey	0	0	0	0													171	170.1
Suspect data Tukey	0	0	0	0													172	171.1
																	172	171.1
																	172	171.1
Lower limit of reference interval	167.466	167.283	167.466	167.283	168												172	171.1
Upper limit of reference interval	179.04	178.906	179.04	178.906	180												172	171.1
																	172	171.1
90% CI for lower limit	166.738	166.346	166.767	166.397	166												172	171.1
	168.307	168.186	168.382	168.102	169.2												172	171.1
90% CI for upper limit	178.002	177.901	177.914	178.021	178												172	171.1
	180.017	179.757	179.928	179.895	181												172	171.1
																	172	171.1
Comments																	172	171.1
The sample size is large enough to compute the nonparametric reference interval : [168 ; 180].																	172	171.1
The confidence intervals of the limits of the nonparametric reference interval was determined using a bootstrap method.																	172	171.1
The 90% CI of one (or more) limit is larger than recommended in IFCC-CLSI C28-A3.																	172	171.1
																	172	171.1
																	173	172.1
																	173	172.1
																	173	172.1
																	173	172.1
																	173	172.1
																	173	172.1
																	173	172.1
																	173	172.1
																	174	173.1
																	174	173.1
																	174	173.1
																	174	173.1
																	174	173.1
																	174	173.1
																	174	173.1
																	174	173.1
																	174	173.1
																	174	173.1
																	174	173.1
																	174	173.1
																	175	174.1
																	175	174.1
																	175	174.1
																	175	174.1
																	175	174.1
																	175	174.1
																	175	174.1
																	175	174.1
																	175	174.1
																	176	175.1
																	176	175.1
																	176	175.1
																	176	175.1
																	176	175.1
																	177	176.1
																	177	176.1
																	177	176.1
																	177	176.1
																	177	176.1
																	177	176.1
																	177	176.1
																	178	177.1
																	178	177.1
																	179	178.1
																	180	179.1
																	180	179.1
																	181	180.1

## Sheet: Report for ALT (SGPT) (U_L)
Reference Value Advisor V2.1	Results for ALT (SGPT) (U/L)																ALT (SGPT) (U/L)	ALT (SGPT) (U/L)Box-Cox
				Date	2021-01-27												0	0.917947
				Performed by	schubigc												0	1.23661
																	0	1.47302
																	0	1.81611
																	0	2.0641
																	1	2.0641
	Untransformed data		Box-Cox transformed data														1	2.16633
Method	Standard	Robust	Standard	Robust	Nonparametric												1	2.16633
																	1	2.16633
																	1	2.25801
N	87	87	87	87	87												1	2.25801
Mean	3.36782		2.84344														1	2.25801
Median	2	2.26139	2.90585	2.86489													1	2.25801
SD	4.79853	4.89491	0.589647	0.595859													1	2.25801
Mininum	0	0	0.917947	0.917947													1	2.25801
Maximum	40	40	4.55212	4.55212													1	2.34109
																	1	2.34109
l1 coefficient Box-Cox			0	0													1	2.34109
l2 coefficient Box-Cox			-0.0361483	-0.0361483													1	2.41703
P-Value Anderson-Darling/	1.76053e-29		0.150751														1	2.41703
Symmetry test for Robust		6.55555e-18		0.00167664													1	2.41703
																	1	2.48693
Outliers Dixon	Max	Max															1	2.55168
Outliers Tukey	2	2	0	0													2	2.55168
Suspect data Tukey	2	2	3	3													2	2.55168
																	2	2.55168
																	2	2.55168
Lower limit of reference interval	-6.22602	-7.46937	5.56627	5.66077	0												2	2.61197
Upper limit of reference interval	12.9617	11.9921	77.2163	79.7036	17												2	2.61197
																	2	2.61197
90% CI for lower limit	-10.3669	-12.7216	4.57013	4.54714	0												2	2.61197
	-1.34604	-2.00936	6.81491	7.21749	0.96												2	2.66837
90% CI for upper limit	6.75038	6.74804	62.0343	60.7664	7.8												2	2.66837
	18.8046	17.2226	96.2543	104.337	40												2	2.66837
																	2	2.77128
Comments																	2	2.77128
Suspect data detected according to Tukey. IFCC-CLSI C28-A3 recommends that unless these data																	2	2.77128
are known to be aberrant observations, the emphasis should be on retaining rather than deleting them.																	2	2.8185
The sample size is large enough to compute the nonparametric reference interval : [0 ; 17].																	2	2.86327
The confidence intervals of the limits of the nonparametric reference interval was determined using a bootstrap method.																	2	2.86327
The 90% CI of one (or more) limit is larger than recommended in IFCC-CLSI C28-A3.																	2	2.86327
																	2	2.86327
																	2	2.90585
																	2	2.90585
																	2	2.90585
																	2	2.90585
																	2	2.94642
																	2	2.94642
																	3	2.98517
																	3	2.98517
																	3	2.98517
																	3	2.98517
																	3	2.98517
																	3	2.98517
																	3	3.02225
																	3	3.02225
																	3	3.0578
																	3	3.0578
																	3	3.0578
																	3	3.0578
																	3	3.09193
																	3	3.09193
																	3	3.12476
																	3	3.12476
																	4	3.15637
																	4	3.18686
																	4	3.2163
																	4	3.27228
																	4	3.29895
																	4	3.29895
																	4	3.32481
																	4	3.32481
																	5	3.32481
																	5	3.32481
																	5	3.37428
																	5	3.44346
																	5	3.48662
																	5	3.48662
																	6	3.5074
																	6	3.56683
																	7	3.60423
																	7	3.65739
																	8	3.69104
																	10	3.8552
																	13	3.99221
																	18	4.11959
																	40	4.55212

[truncated: 9 more sheets: Report for CK (U_L), Report for Bilirubin, Total (m, Report for Albumin (g_dL), Report for Total Protein (g_dL, Report for Cholesterol (mg_dl), Report for Glucose (mg_dl), Report for Creatinine (mg_dl), Report for BUN (mg_dl), Report for AST (U_L)1]
